# Supplementary material for: Genome-Wide Association Study Identifies Chromosome 10q24.32 Variants Associated with Arsenic Metabolism and Toxicity Phenotypes in Bangladesh
Source: PubMed Central journal article supplement (PMC3285587; doi:10.1371/journal.pgen.1002522), 2012-02-23
Supplement: pgen.1002522.s016.pdf [file pgen.1002522.s016.pdf]

Table S4. Functional information for SNPs in LD with rs9527

| No. | rs         | Chromosome | Position  | Allele | LDsnp  | Pop/LD    | TFBS | Splicing(site) | Splicing(ESE or ESS) | Splicing(abolish domain) | miRNA(miRanda) | miRNA(Sanger) | nsSNP | Stop Codon | Polyphen | SNPs3D(svm profile) | SNPs3D(svm structure) | RegPotential | Conservation | Nearby Gene       | Distance (bp) | Allele | GIH   |
|-----|------------|------------|-----------|--------|--------|-----------|------|----------------|----------------------|--------------------------|----------------|---------------|-------|------------|----------|---------------------|-----------------------|--------------|--------------|-------------------|---------------|--------|-------|
| 1   | rs10509760 | 10         | 104624097 | G/A    | rs9527 | GIH/0.597 | --   | --             | --                   | --                       | --             | --            | --    | --         | --       | --                  | --                    | 0            | 0.102        | AS3MT             | 4897  27549   | A      | 0.955 |
| 2   | rs11191381 | 10         | 104483434 | C/T    | rs9527 | GIH/0.543 | --   | --             | --                   | --                       | --             | --            | --    | --         | --       | --                  | --                    | 0            | 0.003        | SFXN2             | 19146  5499   | C      | 0.909 |
| 3   | rs11191401 | 10         | 104563393 | A/G    | rs9527 | GIH/0.692 | --   | --             | --                   | --                       | Y              | --            | --    | --         | --       | --                  | --                    | 0.075831     | 0.001        | C10orf26          | 69676  2618   | A      | 0.926 |
| 4   | rs12241712 | 10         | 104398262 | A/C    | rs9527 | GIH/0.440 | --   | --             | --                   | --                       | --             | --            | --    | --         | --       | --                  | --                    | 0.286948     | 0.038        | TRIM8             | 4020  9804    | C      | 0.892 |
| 5   | rs12416687 | 10         | 104619001 | C/T    | rs9527 | GIH/1.000 | Y    | --             | --                   | --                       | --             | --            | --    | --         | --       | --                  | --                    | 0            | 0            | C10orf32  AS3MT   | -5041  -199   | T      | 0.926 |
| 6   | rs12573077 | 10         | 104424620 | A/C    | rs9527 | GIH/0.440 | --   | --             | --                   | --                       | Y              | --            | --    | --         | --       | --                  | --                    | 0.387467     | 0.003        | ARL3              | 1142  39560   | C      | 0.892 |
| 7   | rs12775883 | 10         | 104475291 | A/G    | rs9527 | GIH/0.471 | --   | --             | --                   | --                       | --             | --            | --    | --         | --       | --                  | --                    | NA           | 0            | SFXN2             | 11003  13642  | G      | 0.898 |
| 8   | rs1475642  | 10         | 104536173 | A/G    | rs9527 | GIH/0.692 | --   | --             | --                   | --                       | --             | --            | --    | --         | --       | --                  | --                    | 0            | 0.001        | C10orf26          | 42456  29838  | A      | 0.926 |
| 9   | rs17784294 | 10         | 104469375 | A/C    | rs9527 | GIH/0.471 | --   | --             | --                   | --                       | --             | --            | --    | --         | --       | --                  | --                    | 0.146476     | 0            | SFXN2             | 5087  19558   | C      | 0.898 |
| 10  | rs3740394  | 10         | 104624464 | G/A    | rs9527 | GIH/0.597 | --   | --             | --                   | --                       | --             | --            | --    | --         | --       | --                  | --                    | 0.011213     | 0            | AS3MT             | 5264  27182   | A      | 0.955 |
| 11  | rs3850699  | 10         | 104404211 | G/A    | rs9527 | GIH/0.440 | --   | --             | --                   | --                       | --             | --            | --    | --         | --       | --                  | --                    | NA           | 0            | TRIM8             | 9969  3855    | A      | 0.892 |
| 12  | rs4919682  | 10         | 104574320 | C/T    | rs9527 | GIH/0.692 | --   | --             | --                   | --                       | --             | --            | --    | --         | --       | --                  | --                    | NA           | 0            | C10orf26  CYP17A1 | -8309  -5958  | C      | 0.926 |
| 13  | rs4919685  | 10         | 104577352 | G/T    | rs9527 | GIH/0.856 | --   | --             | --                   | --                       | --             | --            | --    | --         | --       | --                  | --                    | 0            | 0            | C10orf26  CYP17A1 | -11341  -2926 | G      | 0.915 |
| 14  | rs4919686  | 10         | 104582239 | A/C    | rs9527 | GIH/0.856 | --   | --             | --                   | --                       | --             | --            | --    | --         | --       | --                  | --                    | 0.229877     | 0            | CYP17A1           | 1961  5041    | A      | 0.915 |
| 15  | rs4919687  | 10         | 104585238 | A/G    | rs9527 | GIH/0.700 | --   | --             | --                   | --                       | --             | --            | --    | --         | --       | --                  | --                    | 0.166795     | 0            | CYP17A1           | 4960  2042    | G      | 0.898 |
| 16  | rs4919690  | 10         | 104606490 | C/T    | rs9527 | GIH/0.797 | --   | --             | --                   | --                       | --             | --            | --    | --         | --       | --                  | --                    | 0            | 0            | C10orf32          | 2481  7470    | T      | 0.908 |
| 17  | rs7904252  | 10         | 104446715 | G/T    | rs9527 | GIH/0.471 | --   | --             | --                   | --                       | --             | Y             | --    | --         | --       | --                  | --                    | NA           | 0            | ARL3              | 23237  17465  | G      | 0.898 |
| 18  | rs7904396  | 10         | 104446828 | A/G    | rs9527 | GIH/0.471 | --   | --             | --                   | --                       | --             | --            | --    | --         | --       | --                  | --                    | NA           | 0            | ARL3              | 23350  17352  | G      | 0.898 |
| 19  | rs7907503  | 10         | 104430040 | C/T    | rs9527 | GIH/0.440 | --   | --             | --                   | --                       | --             | --            | --    | --         | --       | --                  | --                    | 0            | 0.009        | ARL3              | 6562  34140   | C      | 0.892 |
| 20  | rs9527     | 10         | 104613568 | T/C    | rs9527 | 1         | --   | --             | --                   | --                       | Y              | Y             | --    | --         | --       | --                  | --                    | 0.233079     | 0.981        | C10orf32          | 9559  392     | C      | 0.926 |
