# Supplementary material for: Genome-Wide Association Study Identifies Chromosome 10q24.32 Variants Associated with Arsenic Metabolism and Toxicity Phenotypes in Bangladesh
Source: PubMed Central journal article supplement (PMC3285587; doi:10.1371/journal.pgen.1002522), 2012-02-23
Supplement: pgen.1002522.s017.pdf [file pgen.1002522.s017.pdf]

Table S5. Functional information for SNPs in LD with rs11191527

| No. | rs         | Chromosome | Position  | Allele | LDsnp      | Pop/LD    | TFBS | Splicing(site) | Splicing(ESE or ESS) | Splicing(abolish domain) | miRNA(miRanda) | miRNA(Sanger) | nsSNP | Stop Codon | Polyphen | SNPs3D(svm profile) | SNPs3D(svm structure) | RegPotential | Conservation | Nearby Gene  | Distance (bp) | Allele       | GIH   |       |
|-----|------------|------------|-----------|--------|------------|-----------|------|----------------|----------------------|--------------------------|----------------|---------------|-------|------------|----------|---------------------|-----------------------|--------------|--------------|--------------|---------------|--------------|-------|-------|
| 1   | rs10218853 | 10         | 104786777 | A/C    | rs11191527 | GIH/0.636 | --   | --             | --                   | --                       | --             | --            | --    | --         | --       | --                  | --                    | 0            | 0            | CNNM2        | 118673  41454 | A            | 0.778 |       |
| 2   | rs10786737 | 10         | 104847208 | A/C    | rs11191527 | GIH/1.000 | --   | --             | --                   | --                       | --             | --            | --    | --         | --       | --                  | --                    | 0            | 0            | NT5C2        | 9306  95798   | A            | 0.847 |       |
| 3   | rs10786744 | 10         | 104935018 | A/C    | rs11191527 | GIH/0.636 | --   | --             | --                   | --                       | --             | --            | --    | --         | --       | --                  | --                    | 0            | 0.003        | NT5C2        | 97116  7988   | C            | 0.778 |       |
| 4   | rs10883790 | 10         | 104630945 | A/C    | rs11191527 | GIH/0.658 | --   | --             | --                   | --                       | --             | --            | --    | --         | --       | --                  | --                    | 0            | 0.944        | AS3MT        | 11745  20701  | A            | 0.784 |       |
| 5   | rs10883800 | 10         | 104661202 | A/C    | rs11191527 | GIH/0.596 | --   | --             | --                   | --                       | --             | --            | --    | --         | --       | --                  | --                    | 0            | 0            | AS3MT  CNNM2 | -9556  -6902  | A            | 0.767 |       |
| 6   | rs10883811 | 10         | 104717269 | A/G    | rs11191527 | GIH/0.596 | --   | --             | --                   | --                       | --             | --            | --    | --         | --       | --                  | --                    | 0            | 0.001        | CNNM2        | 49165  110962 | A            | 0.767 |       |
| 7   | rs10883820 | 10         | 104754651 | A/C    | rs11191527 | GIH/0.636 | --   | --             | --                   | --                       | --             | --            | --    | --         | --       | --                  | --                    | NA           | 0            | CNNM2        | 86547  73580  | C            | 0.778 |       |
| 8   | rs10883839 | 10         | 104910331 | A/G    | rs11191527 | GIH/0.596 | --   | --             | --                   | --                       | --             | --            | --    | --         | --       | --                  | --                    | NA           | 0.185        | NT5C2        | 72429  32675  | A            | 0.767 |       |
| 9   | rs10883843 | 10         | 104937483 | C/G    | rs11191527 | GIH/0.636 | --   | --             | --                   | --                       | --             | --            | --    | --         | --       | --                  | --                    | NA           | 0            | NT5C2        | 99581  5523   | C            | 0.778 |       |
| 10  | rs11191457 | 10         | 104651698 | C/T    | rs11191527 | GIH/0.837 | --   | --             | --                   | --                       | --             | --            | --    | --         | --       | --                  | --                    | 0            | 0.001        | AS3MT  CNNM2 | -52  -16406   | C            | 0.833 |       |
| 11  | rs11191494 | 10         | 104743665 | A/C    | rs11191527 | GIH/0.918 | --   | --             | --                   | --                       | --             | --            | --    | --         | --       | --                  | --                    | NA           | 0            | 0.015        | CNNM2         | 75561  84566 | C     | 0.833 |
| 12  | rs11191506 | 10         | 104758624 | C/T    | rs11191527 | GIH/0.847 | --   | --             | --                   | --                       | --             | --            | --    | --         | --       | --                  | --                    | 0            | 0            | CNNM2        | 90520  69607  | C            | 0.822 |       |
| 13  | rs11191516 | 10         | 104767862 | A/C    | rs11191527 | GIH/0.847 | --   | --             | --                   | --                       | --             | --            | --    | --         | --       | --                  | --                    | 0            | 0.008        | CNNM2        | 99758  60369  | C            | 0.824 |       |
| 14  | rs11191527 | 10         | 104785124 | C/T    | rs11191527 |           | 1    | --             | --                   | --                       | --             | --            | --    | --         | --       | --                  | --                    | 0.235806     | 0.999        | CNNM2        | 117020  43107 | C            | 0.847 |       |
| 15  | rs11191549 | 10         | 104836787 | C/T    | rs11191527 | GIH/0.636 | --   | --             | --                   | --                       | --             | --            | --    | --         | --       | --                  | --                    | 0.176759     | 0            | CNNM2  NT5C2 | -8556  -1115  | C            | 0.778 |       |
| 16  | rs11191554 | 10         | 104845268 | C/T    | rs11191527 | GIH/1.000 | --   | --             | --                   | --                       | --             | --            | --    | --         | --       | --                  | --                    | 0            | 0.011        | NT5C2        | 7366  97738   | C            | 0.847 |       |
| 17  | rs12246739 | 10         | 104777009 | A/C    | rs11191527 | GIH/0.636 | --   | --             | --                   | --                       | --             | --            | --    | --         | --       | --                  | --                    | 0            | 0.001        | CNNM2        | 108905  51222 | C            | 0.778 |       |
| 18  | rs12248123 | 10         | 104725356 | A/G    | rs11191527 | GIH/0.541 | --   | --             | --                   | --                       | --             | --            | --    | --         | --       | --                  | --                    | 0            | 0            | CNNM2        | 57252  102875 | A            | 0.744 |       |
| 19  | rs12573221 | 10         | 104839134 | A/C    | rs11191527 | GIH/0.707 | --   | --             | --                   | --                       | Y              | --            | --    | --         | --       | --                  | --                    | 0.043194     | 0.004        | NT5C2        | 1232  103872  | A            | 0.886 |       |
| 20  | rs12764154 | 10         | 104747699 | A/C    | rs11191527 | GIH/0.847 | --   | --             | --                   | --                       | --             | --            | --    | --         | --       | --                  | --                    | 0            | 0.494        | CNNM2        | 79595  80532  | A            | 0.824 |       |
| 21  | rs12775302 | 10         | 104901346 | A/G    | rs11191527 | GIH/0.596 | --   | --             | --                   | --                       | --             | --            | --    | --         | --       | --                  | --                    | 0            | 0            | NT5C2        | 63444  41660  | A            | 0.767 |       |
| 22  | rs12783467 | 10         | 104698302 | A/G    | rs11191527 | GIH/0.785 | --   | --             | --                   | --                       | --             | --            | --    | --         | --       | --                  | --                    | 0.080959     | 0            | CNNM2        | 30198  129929 | A            | 0.812 |       |
| 23  | rs12785223 | 10         | 104834001 | A/G    | rs11191527 | GIH/0.527 | --   | --             | --                   | --                       | --             | --            | --    | --         | --       | --                  | --                    | 0.141197     | 0.003        | CNNM2  NT5C2 | -5770  -3901  | A            | 0.801 |       |
| 24  | rs1541213  | 10         | 104875320 | A/G    | rs11191527 | GIH/0.596 | Y    | --             | --                   | --                       | --             | --            | --    | --         | --       | --                  | --                    | 0            | 0            | NT5C2        | 37418  67686  | A            | 0.767 |       |
| 25  | rs1556960  | 10         | 104716663 | G/A    | rs11191527 | GIH/0.596 | --   | --             | --                   | --                       | --             | --            | --    | --         | --       | --                  | --                    | 0.132513     | 0.002        | CNNM2        | 48559  111568 | A            | 0.767 |       |
| 26  | rs17115061 | 10         | 104562871 | C/T    | rs11191527 | GIH/0.513 | --   | --             | --                   | --                       | --             | --            | --    | --         | --       | --                  | --                    | 0.284765     | 0.233        | C10orf26     | 69154  3140   | T            | 0.915 |       |
| 27  | rs17115073 | 10         | 104563846 | C/T    | rs11191527 | GIH/0.513 | --   | --             | --                   | --                       | Y              | --            | --    | --         | --       | --                  | --                    | 0            | 0.024        | C10orf26     | 70129  2165   | C            | 0.915 |       |
| 28  | rs1926029  | 10         | 104845660 | G/A    | rs11191527 | GIH/0.636 | --   | --             | --                   | --                       | --             | --            | --    | --         | --       | --                  | --                    | 0            | 0.001        | NT5C2        | 7758  97346   | G            | 0.778 |       |
| 29  | rs1935323  | 10         | 104867025 | T/C    | rs11191527 | GIH/0.629 | --   | --             | --                   | --                       | --             | --            | --    | --         | --       | --                  | --                    | 0            | 0.025        | NT5C2        | 29123  75981  | T            | 0.782 |       |
| 30  | rs2148198  | 10         | 104905300 | A/G    | rs11191527 | GIH/0.596 | --   | --             | --                   | --                       | --             | --            | --    | --         | --       | --                  | --                    | 0            | 0.004        | NT5C2        | 67398  37706  | G            | 0.767 |       |
| 31  | rs3740386  | 10         | 104921041 | T/C    | rs11191527 | GIH/0.552 | Y    | --             | --                   | --                       | --             | --            | --    | --         | --       | --                  | --                    | 0            | 0.024        | NT5C2        | 83139  21965  | C            | 0.771 |       |
| 32  | rs3740392  | 10         | 104626845 | T/C    | rs11191527 | GIH/0.658 | --   | --             | --                   | --                       | --             | --            | --    | --         | --       | --                  | --                    | 0            | 0.004        | AS3MT        | 7645  24801   | T            | 0.784 |       |
| 33  | rs3781281  | 10         | 104842638 | G/A    | rs11191527 | GIH/0.596 | --   | --             | --                   | --                       | --             | --            | --    | --         | --       | --                  | --                    | 0            | 0            | NT5C2        | 4736  100368  | G            | 0.767 |       |
| 34  | rs3781282  | 10         | 104842409 | G/A    | rs11191527 | GIH/0.596 | --   | --             | --                   | --                       | --             | --            | --    | --         | --       | --                  | --                    | 0            | 0            | NT5C2        | 4507  100597  | A            | 0.767 |       |
| 35  | rs3781283  | 10         | 104823038 | G/A    | rs11191527 | GIH/0.628 | --   | --             | --                   | --                       | --             | --            | --    | --         | --       | --                  | --                    | 0            | 0.001        | CNNM2        | 154934  5193  | G            | 0.898 |       |
| 36  | rs3897402  | 10         | 104695402 | C/T    | rs11191527 | GIH/0.847 | --   | --             | --                   | --                       | --             | --            | --    | --         | --       | --                  | --                    | 0            | 0.001        | CNNM2        | 27298  132829 | C            | 0.824 |       |
| 37  | rs7073323  | 10         | 104787413 | A/C    | rs11191527 | GIH/0.616 | --   | --             | --                   | --                       | --             | --            | --    | --         | --       | --                  | --                    | 0            | 0            | CNNM2        | 119309  40818 | A            | 0.773 |       |
| 38  | rs7074395  | 10         | 104834918 | G/T    | rs11191527 | GIH/0.527 | --   | --             | --                   | --                       | --             | --            | --    | --         | --       | --                  | --                    | 0.121518     | 0.001        | CNNM2  NT5C2 | -6687  -2984  | G            | 0.801 |       |
| 39  | rs7085854  | 10         | 104640241 | C/T    | rs11191527 | GIH/0.803 | --   | --             | --                   | --                       | --             | --            | --    | --         | --       | --                  | --                    | NA           | 0.118        | AS3MT        | 21041  11405  | T            | 0.83  |       |
| 40  | rs7089680  | 10         | 104792061 | C/T    | rs11191527 | GIH/0.616 | --   | --             | --                   | --                       | --             | --            | --    | --         | --       | --                  | --                    | 0            | 0.001        | CNNM2        | 123957  36170 | T            | 0.773 |       |
| 41  | rs7894588  | 10         | 104746020 | A/T    | rs11191527 | GIH/0.636 | --   | --             | --                   | --                       | --             | --            | --    | --         | --       | --                  | --                    | 0            | 0.016        | CNNM2        | 77916  82211  | A            | 0.778 |       |
| 42  | rs7898770  | 10         | 104746626 | A/G    | rs11191527 | GIH/0.636 | --   | --             | --                   | --                       | --             | --            | --    | --         | --       | --                  | --                    | 0            | 0.001        | CNNM2        | 78522  81605  | G            | 0.778 |       |
| 43  | rs7899622  | 10         | 104717323 | C/T    | rs11191527 | GIH/0.596 | --   | --             | --                   | --                       | --             | --            | --    | --         | --       | --                  | --                    | 0            | 0            | CNNM2        | 49219  110908 | C            | 0.767 |       |
