# Supplementary material for: Genome-Wide Association Study Identifies Chromosome 10q24.32 Variants Associated with Arsenic Metabolism and Toxicity Phenotypes in Bangladesh
Source: PubMed Central journal article supplement (PMC3285587; doi:10.1371/journal.pgen.1002522), 2012-02-23
Supplement: pgen.1002522.s018.pdf [file pgen.1002522.s018.pdf]

Table S6. Functional information for SNPs in LD with rs4919694

| No. | rs         | Chromosome | Position  | Allele | LDsnp     | Pop/LD    | TFBS | Splicing(site) | Splicing(ESE or ESS) | Splicing(abolish domain) | miRNA(miRanda) | miRNA(Sanger) | nsSNP | Stop Codon | Polyphen | SNPs3D(svm profile) | SNPs3D(svm structure) | RegPotential | Conservation | Nearby Gene   | Distance (bp) | Allele | GIH   |
|-----|------------|------------|-----------|--------|-----------|-----------|------|----------------|----------------------|--------------------------|----------------|---------------|-------|------------|----------|---------------------|-----------------------|--------------|--------------|---------------|---------------|--------|-------|
| 1   | rs10509760 | 10         | 104624097 | G/A    | rs4919694 | GIH/0.419 | --   | --             | --                   | --                       | --             | --            | --    | --         | --       | --                  | --                    | 0            | 0.102        | AS3MT         | 4897  27549   | A      | 0.955 |
| 2   | rs11191439 | 10         | 104628713 | C/T    | rs4919694 | GIH/0.694 | --   | --             | Y                    | Y                        | --             | --            | Y     | --         | --       | --                  | --                    | 0.183361     |              | 1 AS3MT       | 9513  22933   | T      | 0.949 |
| 3   | rs11191545 | 10         | 104819783 | A/G    | rs4919694 | GIH/0.790 | --   | --             | --                   | --                       | --             | --            | --    | --         | --       | --                  | --                    | 0.026001     |              | 0 CNM2        | 151679  8448  | G      | 0.955 |
| 4   | rs12240508 | 10         | 104929222 | A/G    | rs4919694 | GIH/0.500 | --   | --             | --                   | --                       | --             | --            | --    | --         | --       | --                  | --                    | NA           |              | 0 NT5C2       | 91320  13784  | G      | 0.931 |
| 5   | rs12257935 | 10         | 104793052 | A/C    | rs4919694 | GIH/0.790 | --   | --             | --                   | --                       | --             | --            | --    | --         | --       | --                  | --                    | 0.14869      |              | 0.002 CNM2    | 124948  35179 | C      | 0.955 |
| 6   | rs3740394  | 10         | 104624464 | G/A    | rs4919694 | GIH/0.419 | --   | --             | --                   | --                       | --             | --            | --    | --         | --       | --                  | --                    | 0.011213     |              | 0 AS3MT       | 5264  27182   | A      | 0.955 |
| 7   | rs4917995  | 10         | 104835433 | A/T    | rs4919694 | GIH/0.501 | --   | --             | --                   | --                       | --             | --            | --    | --         | --       | --                  | --                    | 0            |              | 0 CNM2  NT5C2 | -7202  -2469  | T      | 0.932 |
| 8   | rs4919694  | 10         | 104688968 | C/T    | rs4919694 | 1         | --   | --             | --                   | --                       | --             | --            | --    | --         | --       | --                  | --                    | 0.077234     |              | 0.005 CNM2    | 20864  139263 | T      | 0.943 |
| 9   | rs7100592  | 10         | 104759088 | G/T    | rs4919694 | GIH/0.790 | --   | --             | --                   | --                       | --             | --            | --    | --         | --       | --                  | --                    | 0            |              | 0.025 CNM2    | 90984  69143  | T      | 0.955 |
