# Supplementary material for: Genome-Wide Association Study Identifies Chromosome 10q24.32 Variants Associated with Arsenic Metabolism and Toxicity Phenotypes in Bangladesh
Source: PubMed Central journal article supplement (PMC3285587; doi:10.1371/journal.pgen.1002522), 2012-02-23
Supplement: pgen.1002522.s019.pdf [file pgen.1002522.s019.pdf]

Table S7. Functional information for SNPs in LD with rs3740394

| No. rs        | Chromosome | Position  | Allele | LDsnp     | Pop/LD    | TFBS | Splicing(site) | Splicing(ESE or ESS) | Splicing(abolish domain) | miRNA(miRanda) | miRNA(Sanger) | nsSNP | Stop Codon | Polyphen | SNPs3D(svm profile) | SNPs3D(svm structure) | RegPotential | Conservation | Nearby Gene       | Distance (bp) | Allele | GIH   |
|---------------|------------|-----------|--------|-----------|-----------|------|----------------|----------------------|--------------------------|----------------|---------------|-------|------------|----------|---------------------|-----------------------|--------------|--------------|-------------------|---------------|--------|-------|
| 1 rs10509760  | 10         | 104624097 | G/A    | rs3740394 | GIH/1.000 | --   | --             | --                   | --                       | --             | --            | --    | --         | --       | --                  | --                    | 0            | 0.102        | AS3MT             | 4897  27549   | A      | 0.955 |
| 2 rs11191381  | 10         | 104483434 | C/T    | rs3740394 | GIH/0.476 | --   | --             | --                   | --                       | --             | --            | --    | --         | --       | --                  | --                    | 0            | 0.003        | SFXN2             | 19146  15499  | C      | 0.909 |
| 3 rs11191401  | 10         | 104563393 | A/G    | rs3740394 | GIH/0.597 | --   | --             | --                   | --                       | Y              | --            | --    | --         | --       | --                  | --                    | 0.075831     | 0.001        | C10orf26          | 69676  12618  | A      | 0.926 |
| 4 rs11191439  | 10         | 104628713 | C/T    | rs3740394 | GIH/0.664 | --   | --             | Y                    | Y                        | --             | --            | Y     | --         | --       | --                  | --                    | 0.183361     | 1            | AS3MT             | 9513  22933   | T      | 0.949 |
| 5 rs11191545  | 10         | 104819783 | A/G    | rs3740394 | GIH/0.540 | --   | --             | --                   | --                       | --             | --            | --    | --         | --       | --                  | --                    | 0.026001     | 0            | CNNM2             | 151679  8448  | G      | 0.955 |
| 6 rs12257935  | 10         | 104793052 | A/C    | rs3740394 | GIH/0.540 | --   | --             | --                   | --                       | --             | --            | --    | --         | --       | --                  | --                    | 0.14869      | 0.002        | CNNM2             | 124948  35179 | C      | 0.955 |
| 7 rs12416687  | 10         | 104619001 | C/T    | rs3740394 | GIH/0.597 | Y    | --             | --                   | --                       | --             | --            | --    | --         | --       | --                  | --                    | 0            | 0            | C10orf32  AS3MT   | -5041  -199   | T      | 0.926 |
| 8 rs12775883  | 10         | 104475291 | A/G    | rs3740394 | GIH/0.418 | --   | --             | --                   | --                       | --             | --            | --    | --         | --       | --                  | --                    | NA           | 0            | SFXN2             | 11003  13642  | G      | 0.898 |
| 9 rs1475642   | 10         | 104536173 | A/G    | rs3740394 | GIH/0.597 | --   | --             | --                   | --                       | --             | --            | --    | --         | --       | --                  | --                    | 0            | 0.001        | C10orf26          | 42456  129838 | A      | 0.926 |
| 10 rs17784294 | 10         | 104469375 | A/C    | rs3740394 | GIH/0.418 | --   | --             | --                   | --                       | --             | --            | --    | --         | --       | --                  | --                    | 0.146476     | 0            | SFXN2             | 5087  19558   | C      | 0.898 |
| 11 rs3740394  | 10         | 104624464 | G/A    | rs3740394 | 1         | --   | --             | --                   | --                       | --             | --            | --    | --         | --       | --                  | --                    | 0.011213     | 0            | AS3MT             | 5264  27182   | A      | 0.955 |
| 12 rs4919682  | 10         | 104574320 | C/T    | rs3740394 | GIH/0.597 | --   | --             | --                   | --                       | --             | --            | --    | --         | --       | --                  | --                    | NA           | 0            | C10orf26  CYP17A1 | -8309  -5958  | C      | 0.926 |
| 13 rs4919685  | 10         | 104577352 | G/T    | rs3740394 | GIH/0.511 | --   | --             | --                   | --                       | --             | --            | --    | --         | --       | --                  | --                    | 0            | 0            | C10orf26  CYP17A1 | -11341  -2926 | G      | 0.915 |
| 14 rs4919686  | 10         | 104582239 | A/C    | rs3740394 | GIH/0.511 | --   | --             | --                   | --                       | --             | --            | --    | --         | --       | --                  | --                    | 0.229877     | 0            | CYP17A1           | 1961  5041    | A      | 0.915 |
| 15 rs4919687  | 10         | 104585238 | A/G    | rs3740394 | GIH/0.418 | --   | --             | --                   | --                       | --             | --            | --    | --         | --       | --                  | --                    | 0.166795     | 0            | CYP17A1           | 4960  2042    | G      | 0.898 |
| 16 rs4919690  | 10         | 104606490 | C/T    | rs3740394 | GIH/0.476 | --   | --             | --                   | --                       | --             | --            | --    | --         | --       | --                  | --                    | 0            | 0            | C10orf32          | 2481  7470    | T      | 0.908 |
| 17 rs4919694  | 10         | 104688968 | C/T    | rs3740394 | GIH/0.419 | --   | --             | --                   | --                       | --             | --            | --    | --         | --       | --                  | --                    | 0.077234     | 0.005        | CNNM2             | 20864  139263 | T      | 0.943 |
| 18 rs7100592  | 10         | 104759088 | G/T    | rs3740394 | GIH/0.540 | --   | --             | --                   | --                       | --             | --            | --    | --         | --       | --                  | --                    | 0            | 0.025        | CNNM2             | 90984  69143  | T      | 0.955 |
| 19 rs7904252  | 10         | 104446715 | G/T    | rs3740394 | GIH/0.418 | --   | --             | --                   | --                       | Y              | --            | --    | --         | --       | --                  | --                    | NA           | 0            | ARL3              | 23237  17465  | G      | 0.898 |
| 20 rs7904396  | 10         | 104446828 | A/G    | rs3740394 | GIH/0.418 | --   | --             | --                   | --                       | --             | --            | --    | --         | --       | --                  | --                    | NA           | 0            | ARL3              | 23350  17352  | G      | 0.898 |
| 21 rs9527     | 10         | 104613568 | T/C    | rs3740394 | GIH/0.597 | --   | --             | --                   | --                       | Y              | Y             | --    | --         | --       | --                  | --                    | 0.233079     | 0.981        | C10orf32          | 9559  392     | C      | 0.926 |
