# Supplementary material for: Genome-Wide Association Study Identifies Chromosome 10q24.32 Variants Associated with Arsenic Metabolism and Toxicity Phenotypes in Bangladesh
Source: PubMed Central journal article supplement (PMC3285587; doi:10.1371/journal.pgen.1002522), 2012-02-23
Supplement: pgen.1002522.s020.pdf [file pgen.1002522.s020.pdf]

Table S8. Functional information for SNPs in LD with rs11191659

| No. rs       | Chromosome | Position  | Allele | LDsnp      | Pop/LD    | TFBS | Splicing(site) | Splicing(ESE or ESS) | Splicing(abolish domain) | miRNA(miRanda) | miRNA(Sanger) | nsSNP | Stop Codon | Polyphen | SNPs3D(svm profile) | SNPs3D(svm structure) | RegPotential | Conservation | Nearby Gene          | Distance (bp)  | Allele | GIH   |
|--------------|------------|-----------|--------|------------|-----------|------|----------------|----------------------|--------------------------|----------------|---------------|-------|------------|----------|---------------------|-----------------------|--------------|--------------|----------------------|----------------|--------|-------|
| 1 rs10883841 | 10         | 104924699 | C/T    | rs11191659 | GIH/0.828 | --   | --             | --                   | --                       | --             | --            | Y     | --         | benign   | --                  | --                    | 0.17821      | 1            | NT5C2                | 86797  18307   | T      | 0.972 |
| 2 rs11191606 | 10         | 104946025 | C/T    | rs11191659 | GIH/1.000 | Y    | --             | --                   | --                       | --             | --            | --    | --         | --       | --                  | --                    | 0            | 0.02         | LOC729081  LOC401648 | -19983  -19431 | T      | 0.966 |
| 3 rs11191655 | 10         | 105068783 | C/T    | rs11191659 | GIH/1.000 | --   | --             | --                   | --                       | --             | --            | --    | --         | --       | --                  | --                    | 0            | 0.014        | PCGF6                | 16240  32098   | T      | 0.966 |
| 4 rs11191659 | 10         | 105091691 | C/T    | rs11191659 | 1         | --   | --             | --                   | --                       | --             | --            | --    | --         | --       | --                  | --                    | NA           | 0            | PCGF6                | 39148  9190    | C      | 0.966 |
